# Supplementary material for: Comparative transcriptome analysis reveals the mechanism of cross-protection against Verticillium wilt conferred on sunflower by hypovirulent strain Gibellulopsis nigrescens Vn-1
Source: Research Square preprint supplement (doi:10.21203/rs.3.rs-121872/v1), 2020-12-15
Supplement: Supplementary file 2 [file c3ae4636920a81790e4f180a.docx]

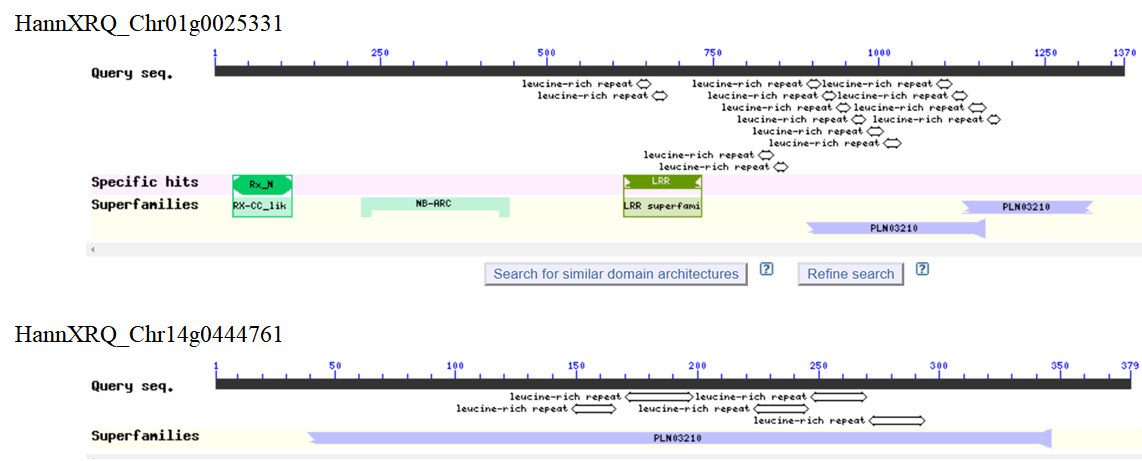


**Fig S4. Conserved domain prediction of two receptors**

**Comparative transcriptome analysis reveals the mechanism of cross-protection against *Verticillium* wilt conferred on sunflower by hypovirulent strain *Gibellulopsis nigrescens* Vn-1**

**Authors：**

Xin Zhao#, Bao-Zhu Dong#, Ying-Jie Zhao, Dong Wang, Lan Jing, Hong-You Zhou*

**#Xin Zhao and Bao-Zhu Dong contributed equally to this work.**

**Institution:**

College of Horticulture and Plant Protection, Inner Mongolia Agricultural University, Hohhot, 100010, China
